# Supplementary material for: Emergent coronary revascularization with percutaneous coronary intervention and coronary artery bypass grafting in patients receiving extracorporeal cardiopulmonary resuscitation
Source: PubMed Central journal article supplement — Eur J Cardiothorac Surg. 2024 Jul 29;66(2):ezae290. doi: 10.1093/ejcts/ezae290 (PMC11315652; doi:10.1093/ejcts/ezae290), 2024-07-29
Supplement: ezae290_supplementary_data.pdf [file ezae290_supplementary_data.pdf]

Supplementary Data

Table S1 Hospital outcomes of patents who had out-of-hospital cardiac arrest and in-hospital cardiac arrest

|      | CABG | PCI | Weaning ECMO, no. (%) |           |                   | Hospital survival without VAD or HTx, no. (%) |          |                   | Composite of major complications, no. (%) |           |                   |
|------|------|-----|-----------------------|-----------|-------------------|-----------------------------------------------|----------|-------------------|-------------------------------------------|-----------|-------------------|
|      |      |     | CABG                  | PCI       | p for interaction | CABG                                          | PCI      | p for interaction | CABG                                      | PCI       | p for interaction |
| OHCA | 15   | 17  | 10(66.7%)             | 8(61.5%)  | 0.253             | 9(60%)                                        | 5(41.7%) | 0.710             | 10(66.7%)                                 | 10(76.9%) | 0.708             |
| IHCA | 25   | 23  | 17(73.9%)             | 10(41.7%) |                   | 13(54.2%)                                     | 7(28%)   |                   | 15(60%)                                   | 17(63%)   |                   |

CABG, coronary artery bypass grafting; ECMO, extracorporeal membrane oxygenation; HTx, heart

transplant; IHCA, in-hospital cardiac arrest; OHCA, out-of-hospital cardiac arrest; PCI, primary coronary

intervention; VAD, ventricular assist device

Table S2 Impact of ECMO to revascularization time on hospital outcomes

|                                         | <b>ECMO-to-revascularization time (mins)</b> |             | p value |
|-----------------------------------------|----------------------------------------------|-------------|---------|
| <b>Weaning ECMO</b>                     | Success                                      | 278.6±333.3 | 0.99    |
|                                         | Fail                                         | 154.3±116.9 |         |
| <b>Hospital survival</b>                | Survival                                     | 332.9±384.8 | 0.19    |
|                                         | Death                                        | 155.9±110.0 |         |
| <b>Composite of major complications</b> | Yes                                          | 264.3±342.6 | 0.49    |
|                                         | No                                           | 177.3±91.6  |         |

ECMO, extracorporeal membrane oxygenation

Figure S1 Distribution of coronary lesions of entire cohort (n=215)

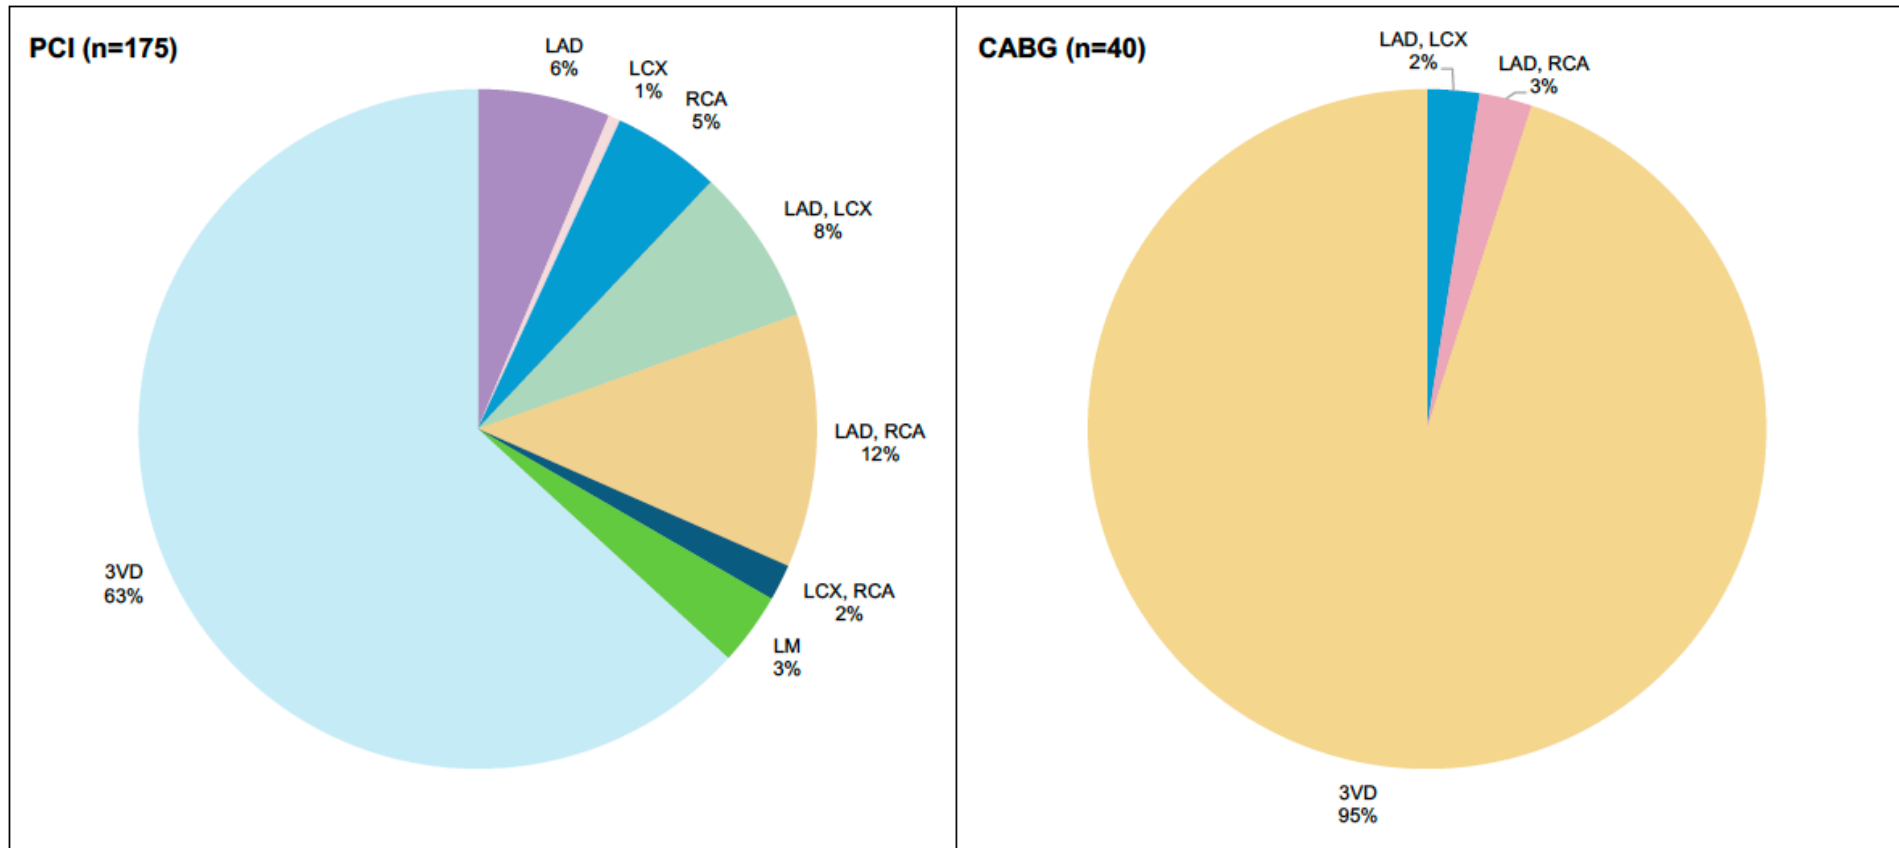

Figure S2 Distribution of coronary lesions of entire cohort (n=80)

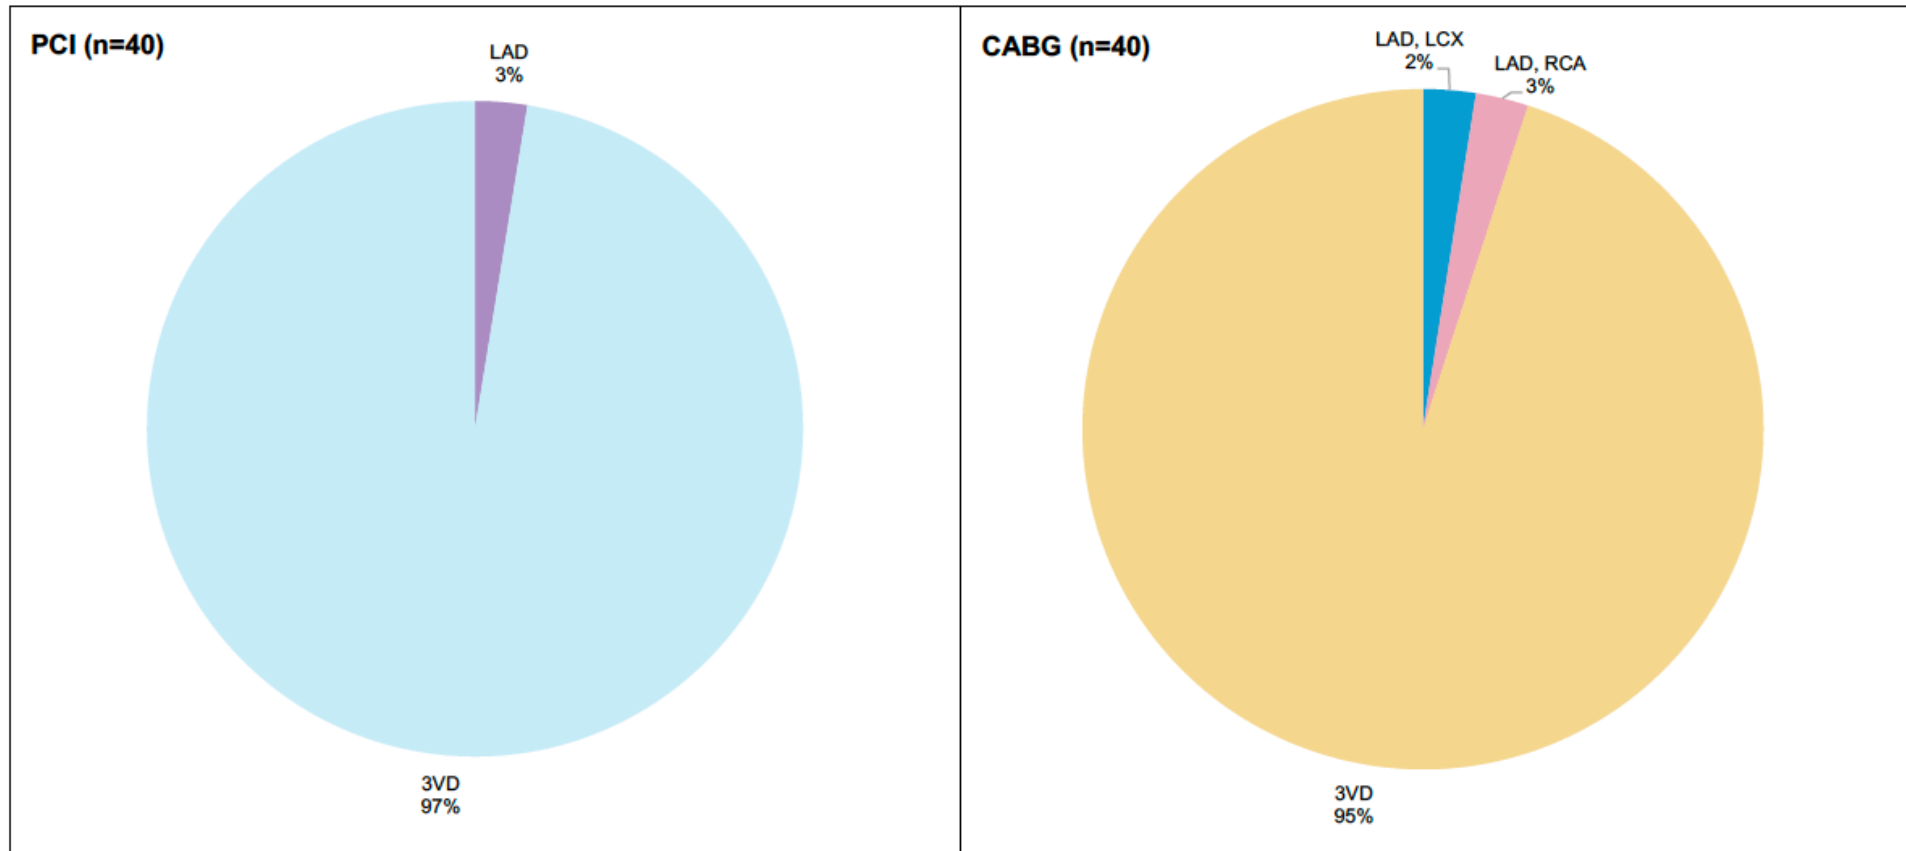

Figure S3 Comparison of hospital outcomes between patients with and without IABP

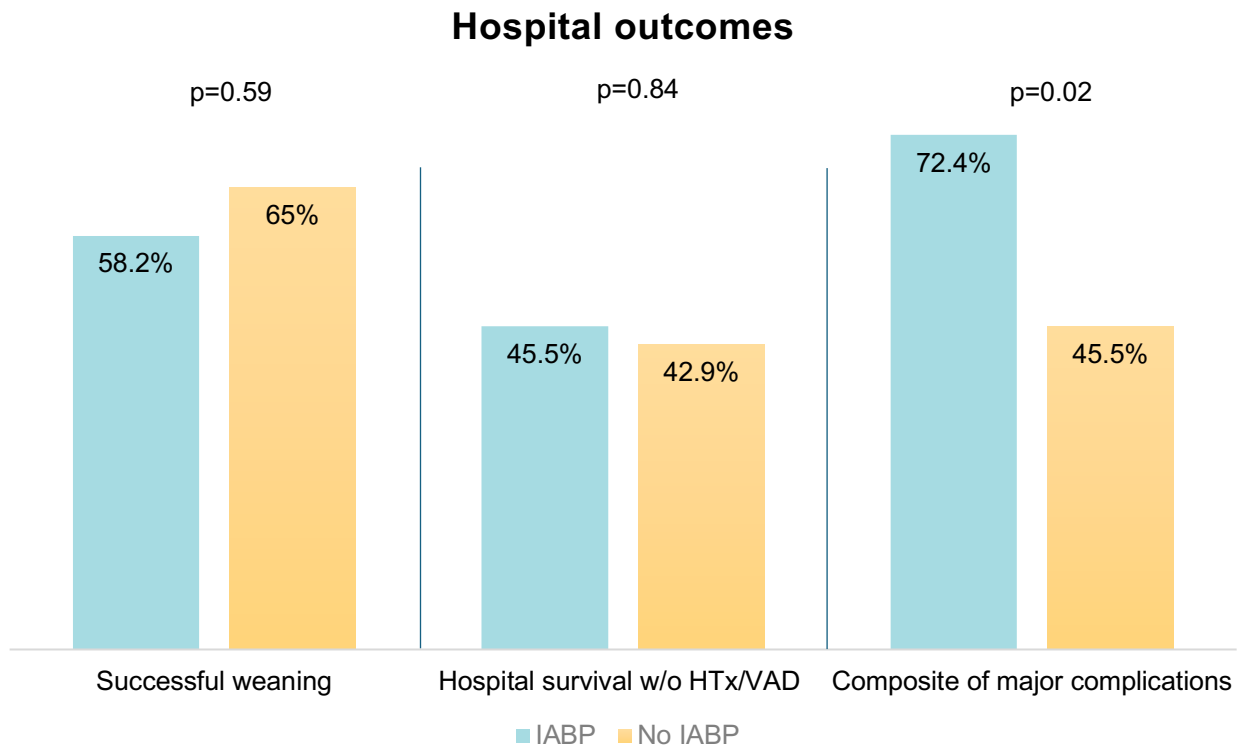

HTx, heart transplant; IABP, intra-aortic balloon counterpulsation; VAD, ventricular assist device
